# Supplementary material for: The Hippo pathway polarizes the actin cytoskeleton during collective migration of Drosophila border cells
Source: PubMed Central journal article supplement — J Cell Biol. 2013 Jun 10;201(6):875–85. doi: 10.1083/jcb.201210073 (PMC3678158; doi:10.1083/jcb.201210073), 2013-06-10
Supplement: supp_jcb.201210073_JCB_201210073_sm.pdf [file supp_jcb.201210073_JCB_201210073_sm.pdf]

Lucas et al., <http://www.jcb.org/cgi/content/full/jcb.201210073/DC1>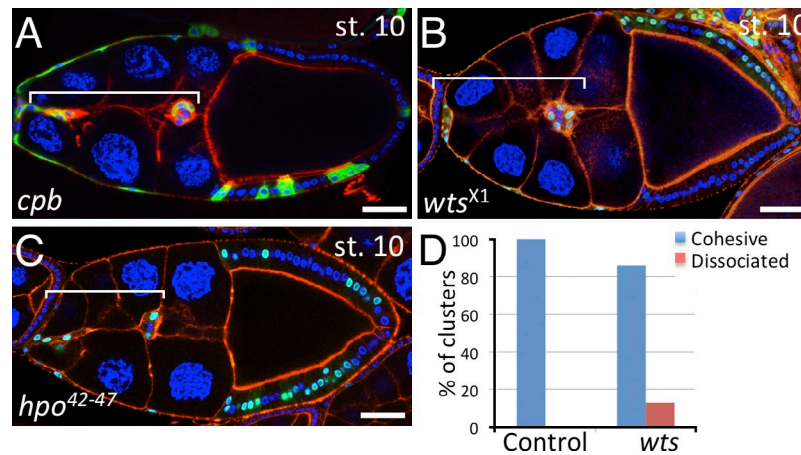

Figure S1. **Quantification of disintegration defects in *wts* mutant clusters.** (A) *cpb<sup>M143</sup>* mutant border cell clusters can disintegrate. (B) *wts<sup>X1</sup>* mutant cluster showing disintegration. (C) *hpo<sup>42-47</sup>* mutant cluster showing disintegration. (D) Quantification of the percentage of dissociated/disintegrated border cell clusters in the following genotypes: control ( $n > 100$ ) and *wts<sup>X1</sup>* ( $n = 93$ ) mutant clusters. Anterior is to the left in all panels.

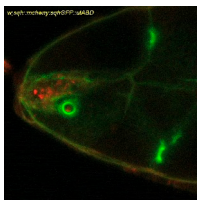

Video 1. **Polarization of F-actin visualized with Utrophin-GFP in border cells.** Border cells expressing *UAS-utrophin-GFP* driven by *c306.G4*. Images were acquired by time-lapse confocal microscopy using a laser-scanning confocal microscope (LSM780 invert; Carl Zeiss). Frames were taken every 3 min over a period of 5 h.

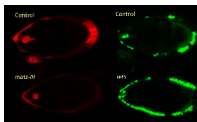

Video 2. **Tumbling migration of *wts<sup>X1</sup>* or *mats-IR* clusters versus a control.** MARCM clones expressing GFP-labeled *wts<sup>X1</sup>* border cells as well as some follicle cells. Control border cells expressing blank *FRT-GFP*. *Mats-IR* border cells and corresponding control border cells labeled with *UAS-mcherry-jupiter* and driven by *c306.G4*. Images were acquired by time-lapse confocal microscopy using a laser-scanning confocal microscope (LSM780 invert; Carl Zeiss). Frames were taken every 3 min over a period of 5 h.

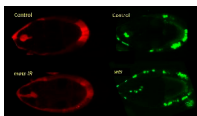

Video 3. **Disintegration of *wts<sup>X1</sup>* or *mats-IR* clusters versus a control.** MARCM clones expressing GFP-labeled *wts<sup>X1</sup>* border cells as well as some follicle cells. Control border cells expressing blank *FRT-GFP*. *Mats-IR* border cells and corresponding control border cells labeled with *UAS-mcherry-jupiter* and driven by *c306.G4*. Images were acquired by time-lapse confocal microscopy using a laser-scanning confocal microscope (LSM780 invert; Carl Zeiss). Frames were taken every 3 min over a period of 5 h.

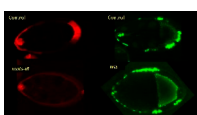

Video 4. **Failure of detachment of *wts<sup>X1</sup>* or *mats-IR* clusters versus a control.** MARCM clones expressing GFP-labeled *wts<sup>X1</sup>* border cells as well as some follicle cells. Control border cells expressing blank *FRT-GFP*. *Mats-IR* border cells and corresponding control border cells labeled with *UAS-mcherry-jupiter* and driven by *c306.G4*. Images were acquired by time-lapse confocal microscopy using a laser-scanning confocal microscope (LSM780 invert; Carl Zeiss). Frames were taken every 3 min over a period of 5 h.

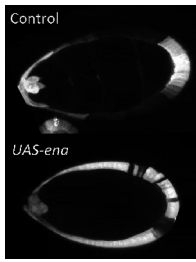

Video 5. **Tumbling migration of a *UAS-ena* cluster versus a control.** *Afour.G4* clones expressing GFP-labeled *UAS-ena* border cells as well as follicle cells. Control border cells labeled with *UAS-mcherry-jupiter* and driven by *c306.G4*. Images were acquired by time-lapse confocal microscopy using a laser-scanning confocal microscope (LSM780 invert; Carl Zeiss). Frames were taken every 3 min over a period of 5 h.

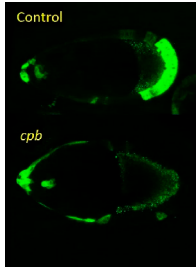

Video 6. **Disintegration of a *cpb<sup>M143</sup>* cluster versus a control.** MARCM clones expressing GFP-labeled *cpb<sup>M143</sup>* border cells as well as some follicle cells. Control border cells expressing blank *FRT-GFP*. Images were acquired by time-lapse confocal microscopy using a laser-scanning confocal microscope (LSM780 invert; Carl Zeiss). Frames were taken every 3 min over a period of 5 h.

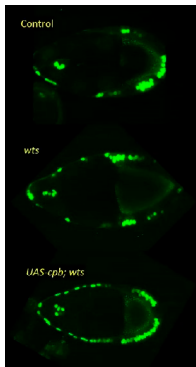

Video 7. **Rescue of *wts<sup>1</sup>* mutant migration by expression of Cpb.** MARCM clones expressing GFP-labeled blank *FRT-GFP* (control), *wts<sup>1</sup>*, or *UAS-cpb;wts<sup>1</sup>* border cells as well as some follicle cells. Images were acquired by time-lapse confocal microscopy using a laser-scanning confocal microscope (LSM780 invert; Carl Zeiss). Frames were taken every 3 min over a period of 5 h.
